# Supplementary material for: Replication Fork Polarity Gradients Revealed by Megabase-Sized U-Shaped Replication Timing Domains in Human Cell Lines
Source: PubMed Central journal article supplement (PMC3320577; doi:10.1371/journal.pcbi.1002443), 2012-04-05
Supplement: pcbi.1002443.s004.pdf [file pcbi.1002443.s004.pdf]

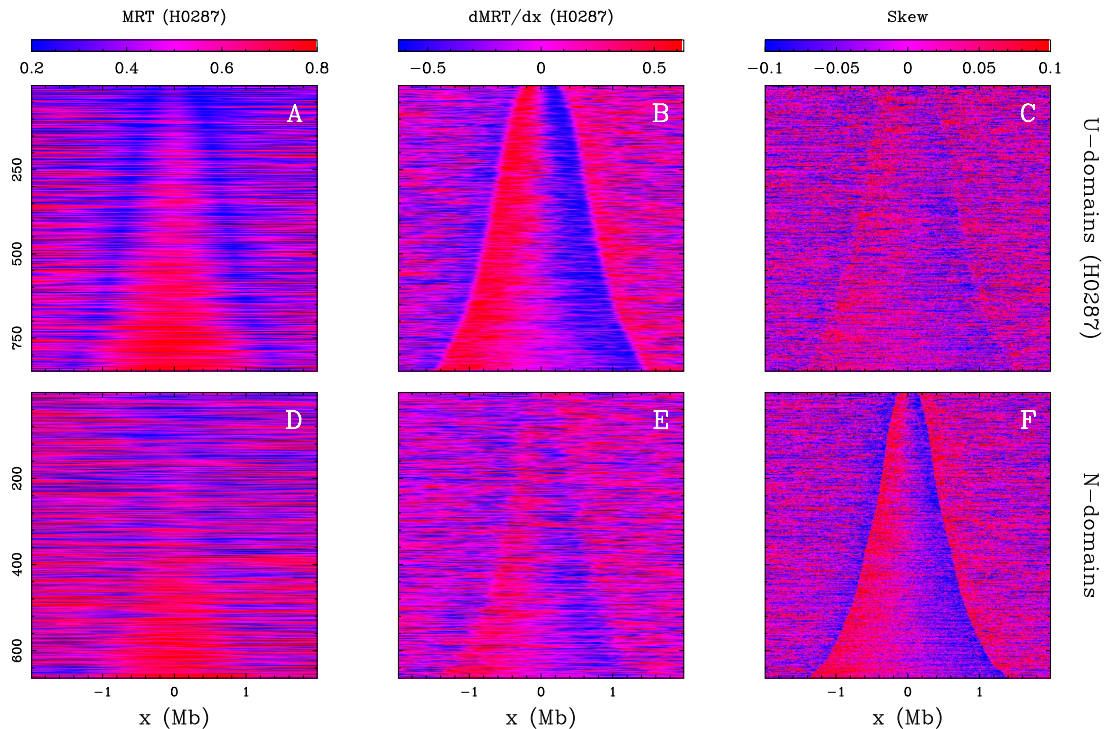

**Figure S4.** Same as in Supplementary Fig. S1 but for the lymphoblastoid H0287 cell line (830 replication timing U-domains).
