# Supplementary material for: Replication Fork Polarity Gradients Revealed by Megabase-Sized U-Shaped Replication Timing Domains in Human Cell Lines
Source: PubMed Central journal article supplement (PMC3320577; doi:10.1371/journal.pcbi.1002443), 2012-04-05
Supplement: pcbi.1002443.s016.pdf [file pcbi.1002443.s016.pdf]

| R       | BG02 | K562 | GM06990 | H0287 | TL010 | BJ R1 | BJ R2 | HeLa R1 | HeLa R2 |
|---------|------|------|---------|-------|-------|-------|-------|---------|---------|
| BG02    | 1    | 0.42 | 0.39    | 0.39  | 0.35  | 0.39  | 0.41  | 0.36    | 0.31    |
| K562    | 0.42 | 1    | 0.58    | 0.57  | 0.56  | 0.43  | 0.48  | 0.39    | 0.34    |
| GM06990 | 0.39 | 0.58 | 1       | 0.9   | 0.84  | 0.47  | 0.5   | 0.41    | 0.34    |
| H0287   | 0.39 | 0.57 | 0.9     | 1     | 0.84  | 0.47  | 0.49  | 0.41    | 0.35    |
| TL010   | 0.35 | 0.56 | 0.84    | 0.84  | 1     | 0.45  | 0.45  | 0.37    | 0.32    |
| BJ R1   | 0.39 | 0.43 | 0.47    | 0.47  | 0.45  | 1     | 0.92  | 0.52    | 0.48    |
| BJ R2   | 0.41 | 0.48 | 0.5     | 0.49  | 0.45  | 0.92  | 1     | 0.53    | 0.48    |
| HeLa R1 | 0.36 | 0.39 | 0.41    | 0.41  | 0.37  | 0.52  | 0.53  | 1       | 0.76    |
| HeLa R2 | 0.31 | 0.34 | 0.34    | 0.35  | 0.32  | 0.48  | 0.48  | 0.76    | 1       |

**Table S1.** Pearson correlation (R values) of the derivative of MRT,  $dMRT/dx$ , between different pairs of human cell lines (Methods).  $dMRT/dx$  was calculated in non-overlapping 100 kb windows over the 22 human autosomes. All p-values are  $< 10^{-16}$ .
