# Supplementary material for: Replication Fork Polarity Gradients Revealed by Megabase-Sized U-Shaped Replication Timing Domains in Human Cell Lines
Source: PubMed Central journal article supplement (PMC3320577; doi:10.1371/journal.pcbi.1002443), 2012-04-05
Supplement: pcbi.1002443.s019.pdf [file pcbi.1002443.s019.pdf]

|         | Ndom | BG02 | K562 | GM06990 | H0287 | TL010 | BJ R1 | BJ R2 | HeLa R1 | HeLa R2 |
|---------|------|------|------|---------|-------|-------|-------|-------|---------|---------|
| Ndom    | 1.96 | 1.96 | 2.4  | 2.49    | 2.53  | 2.71  | 2.17  | 2.09  | 1.9     | 1.74    |
| BG02    | 4.52 | 4.69 | 5.14 | 5.22    | 5.06  | 5.27  | 5.04  | 5.05  | 4.64    | 4.41    |
| K562    | 3.17 | 2.93 | 3.88 | 4.08    | 4.22  | 4.37  | 3.3   | 3.21  | 2.88    | 2.54    |
| GM06990 | 3.32 | 3    | 4.11 | 4.54    | 4.7   | 4.82  | 3.39  | 3.29  | 2.88    | 2.54    |
| H0287   | 3.17 | 2.74 | 4    | 4.42    | 4.46  | 4.67  | 3.22  | 3.05  | 2.74    | 2.34    |
| TL010   | 2.71 | 2.28 | 3.31 | 3.63    | 3.73  | 4.07  | 2.7   | 2.57  | 2.25    | 1.94    |
| BJ R1   | 3.77 | 3.78 | 4.34 | 4.42    | 4.46  | 4.67  | 4.26  | 4.17  | 3.73    | 3.47    |
| BJ R2   | 3.92 | 4.11 | 4.57 | 4.65    | 4.58  | 4.82  | 4.52  | 4.49  | 3.94    | 3.81    |
| HeLa R1 | 4.07 | 4.3  | 4.68 | 4.65    | 4.7   | 4.82  | 4.61  | 4.49  | 4.15    | 4.01    |
| HeLa R2 | 3.92 | 4.3  | 4.34 | 4.31    | 4.22  | 4.37  | 4.52  | 4.57  | 4.22    | 4.14    |

**Table S4.** Percentage of matchings between randomly re-positioned replication timing U-domains in different pairs of cell lines including skew N-domains in the germline (1000 simulations were used to obtain the mean values). A U-domain in a given cell line (column) was considered as matching a U-domain in another cell line (row) if more than 80% nucleotides of each of these U-domains were common to the two domains.
