# Supplementary material for: Replication Fork Polarity Gradients Revealed by Megabase-Sized U-Shaped Replication Timing Domains in Human Cell Lines
Source: PLoS Comput Biol. 2012 Apr 5;8(4):e1002443. doi: 10.1371/journal.pcbi.1002443 (PMC3320577; doi:10.1371/journal.pcbi.1002443)
Supplement: Table S2 — Number of matchings between replication timing U-domains in different pairs of cell lines including skew N-domains in the germline. A U-domain in a given cell line (column) was considered as matching a U-domain in another cell line (row) if more than 80% nucleotides of each of these U-domains were common to the two domains. (PDF) [file pcbi.1002443.s017.pdf]

|         | Ndom | BG02 | K562 | GM06990 | H0287 | TL010 | BJ R1 | BJ R2 | HeLa R1 | HeLa R2 |
|---------|------|------|------|---------|-------|-------|-------|-------|---------|---------|
| Ndom    | 663  | 157  | 119  | 119     | 109   | 86    | 83    | 100   | 120     | 124     |
| BG02    | 157  | 1534 | 197  | 189     | 170   | 119   | 207   | 246   | 238     | 228     |
| K562    | 119  | 197  | 876  | 251     | 239   | 205   | 184   | 191   | 197     | 188     |
| GM06990 | 119  | 189  | 251  | 882     | 536   | 373   | 184   | 196   | 173     | 181     |
| H0287   | 109  | 170  | 239  | 536     | 830   | 376   | 194   | 193   | 185     | 165     |
| TL010   | 86   | 119  | 205  | 373     | 376   | 664   | 141   | 148   | 131     | 138     |
| BJ R1   | 83   | 207  | 184  | 184     | 194   | 141   | 1150  | 855   | 334     | 306     |
| BJ R2   | 100  | 246  | 191  | 196     | 193   | 148   | 855   | 1247  | 356     | 332     |
| HeLa R1 | 120  | 238  | 197  | 173     | 185   | 131   | 334   | 356   | 1422    | 776     |
| HeLa R2 | 124  | 228  | 188  | 181     | 165   | 138   | 306   | 332   | 776     | 1498    |

**Table S2.** Number of matchings between replication timing U-domains in different pairs of cell lines including skew N-domains in the germline. A U-domain in a given cell line (column) was considered as matching a U-domain in another cell line (row) if more than 80% nucleotides of each of these U-domains were common to the two domains.
