# Supplementary material for: Replication Fork Polarity Gradients Revealed by Megabase-Sized U-Shaped Replication Timing Domains in Human Cell Lines
Source: PLoS Comput Biol. 2012 Apr 5;8(4):e1002443. doi: 10.1371/journal.pcbi.1002443 (PMC3320577; doi:10.1371/journal.pcbi.1002443)
Supplement: Table S3 — Number of matchings between randomly re-positioned replication timing U-domains in different pairs of cell lines including skew N-domains in the germline (1000 simulations were used to obtain the mean values). A U-domain in a given cell line (column) was considered as matching a U-domain in another cell line (row) if more than 80% nucleotides of each of these U-domains were common to the two domains. (PDF) [file pcbi.1002443.s018.pdf]

|         | Ndom | BG02 | K562 | GM06990 | H0287 | TL010 | BJ R1 | BJ R2 | HeLa R1 | HeLa R2 |
|---------|------|------|------|---------|-------|-------|-------|-------|---------|---------|
| Ndom    | 13   | 30   | 21   | 22      | 21    | 18    | 25    | 26    | 27      | 26      |
| BG02    | 30   | 72   | 45   | 46      | 42    | 35    | 58    | 63    | 66      | 66      |
| K562    | 21   | 45   | 34   | 36      | 35    | 29    | 38    | 40    | 41      | 38      |
| GM06990 | 22   | 46   | 36   | 40      | 39    | 32    | 39    | 41    | 41      | 38      |
| H0287   | 21   | 42   | 35   | 39      | 37    | 31    | 37    | 38    | 39      | 35      |
| TL010   | 18   | 35   | 29   | 32      | 31    | 27    | 31    | 32    | 32      | 29      |
| BJ R1   | 25   | 58   | 38   | 39      | 37    | 31    | 49    | 52    | 53      | 52      |
| BJ R2   | 26   | 63   | 40   | 41      | 38    | 32    | 52    | 56    | 56      | 57      |
| HeLa R1 | 27   | 66   | 41   | 41      | 39    | 32    | 53    | 56    | 59      | 60      |
| HeLa R2 | 26   | 66   | 38   | 38      | 35    | 29    | 52    | 57    | 60      | 62      |

**Table S3.** Number of matchings between randomly re-positioned replication timing U-domains in different pairs of cell lines including skew N-domains in the germline (1000 simulations were used to obtain the mean values). A U-domain in a given cell line (column) was considered as matching a U-domain in another cell line (row) if more than 80% nucleotides of each of these U-domains were common to the two domains.
